# Supplementary material
Source: PubMed Central journal article supplement (PMC4572847)
Supplement: NIHMS720077-supplement-Table_S1.pdf [file NIHMS720077-supplement-Table_S1.pdf]

**Table S1. Details on number of experiments and cells analyzed for all presented data**

| Figure  | Treatment | Biomarker  | Time (hrs) | Experiments | Cells (0%) | Cells (2%) | Cells (5%) | Cells (9%) | Cells (15%) |
|---------|-----------|------------|------------|-------------|------------|------------|------------|------------|-------------|
| 1B, S4E | WT        | TBSmCherry | 2          | 3           | 2588       | 3070       | 2871       | 2753       | 2811        |
|         | WT        | TBSmCherry | 4          | 3           | 3699       | 3467       | 3504       | 3240       | 3160        |
|         | WT        | TBSmCherry | 6          | 3           | 1988       | 2107       | 2137       | 2824       | 3459        |
|         | WT        | TBSmCherry | 8          | 3           | 3163       | 3066       | 3051       | 1443       | 3452        |
|         | WT        | TBSmCherry | 12         | 3           | 3197       | 3147       | 2748       | 2750       | 2756        |
|         | WT        | TBSmCherry | 16         | 3           | 3534       | 3074       | 2854       | 3123       | 3641        |
|         | WT        | TBSmCherry | 24         | 3           | 1822       | 1909       | 2098       | 2086       | 2175        |
| 1C, S2B | WT        | Ki67       | 2          | 8           | 6431       | 6927       | 7024       | 7180       | 6587        |
|         | WT        | Ki67       | 4          | 5           | 5790       | 5404       | 5125       | 5843       | 5973        |
|         | WT        | Ki67       | 6          | 4           | 2747       | 2829       | 3464       | 3419       | 3832        |
|         | WT        | Ki67       | 8          | 7           | 6050       | 7226       | 6088       | 6127       | 7098        |
|         | WT        | Ki67       | 12         | 6           | 5377       | 5688       | 4148       | 4318       | 5092        |
|         | WT        | Ki67       | 16         | 3           | 3312       | 2941       | 3110       | 3214       | 3169        |
|         | WT        | Ki67       | 24         | 3           | 2511       | 1799       | 2136       | 2224       | 1222        |
| 1D, S5E | WT        | TOPdGFP    | 2          | 7           | 4971       | 4850       | 4967       | 4851       | 5056        |
|         | WT        | TOPdGFP    | 4          | 6           | 4769       | 4750       | 5136       | 5128       | 4944        |
|         | WT        | TOPdGFP    | 6          | 4           | 2380       | 2378       | 2677       | 2678       | 2871        |
|         | WT        | TOPdGFP    | 8          | 7           | 3222       | 3625       | 3630       | 3719       | 3965        |
|         | WT        | TOPdGFP    | 12         | 4           | 2222       | 1884       | 1932       | 2053       | 2091        |
|         | WT        | TOPdGFP    | 16         | 3           | 1724       | 1545       | 1477       | 1444       | 1596        |
|         | WT        | TOPdGFP    | 24         | 3           | 2017       | 1448       | 1707       | 1788       | 1769        |
| 1E, S2D | WT        | EdU        | 2          | 4           | 3916       | 4315       | 4043       | 4050       | 3754        |
|         | WT        | EdU        | 4          | 4           | 4514       | 4418       | 4746       | 4666       | 4798        |
|         | WT        | EdU        | 6          | 4           | 3421       | 4499       | 3432       | 3536       | 3251        |
|         | WT        | EdU        | 8          | 4           | 3787       | 3735       | 3099       | 3531       | 3603        |
|         | WT        | EdU        | 12         | 3           | 3346       | 3374       | 3583       | 3578       | 3701        |
|         | WT        | EdU        | 16         | 4           | 3579       | 3294       | 3772       | 3492       | 3855        |
|         | WT        | EdU        | 24P        | 4           | 3837       | 3760       | 3958       | 3959       | 4378        |
|         | WT        | EdU        | 24C        | 6           | 6554       | -          | -          | -          | 7390        |
| 2A      | WT        | TBSmCherry | 4          | 3           | 4494       | -          | -          | -          | 4373        |
|         | YTIP      | TBSmCherry | 4          | 3           | 181        | -          | -          | -          | 103         |
| 2C      | WT        | TOPdGFP    | 8          | 3           | 3679       | -          | -          | -          | 3366        |
|         | YTIP      | TOPdGFP    | 8          | 3           | 208        | -          | -          | -          | 248         |
| 2E      | WT        | Ki67       | 4          | 3           | 2565       | -          | -          | -          | 3261        |
|         | YTIP      | Ki67       | 4          | 3           | 116        | -          | -          | -          | 259         |
| 2G      | WT        | EdU        | 16         | 3           | 4203       | -          | -          | -          | 5230        |
|         | YTIP      | EdU        | 16         | 3           | 160        | -          | -          | -          | 110         |

**Table S1. Continued**

| Figure | Treatment   | Biomarker        | Time (hrs) | Experiments | Cells (0%) | Cells (2%) | Cells (5%) | Cells (9%) | Cells (15%) |
|--------|-------------|------------------|------------|-------------|------------|------------|------------|------------|-------------|
| 3B     | WT          | Ki67             | 8          | 3           | 3861       | -          | -          | -          | 3130        |
|        | $\beta$ Eng | Ki67             | 8          | 3           | 4831       | -          | -          | -          | 5161        |
| 3C     | WT          | EdU              | 16         | 4           | 5568       | -          | -          | -          | 5957        |
|        | $\beta$ Eng | EdU              | 16         | 4           | 6081       | -          | -          | -          | 7006        |
| 3D     | WT          | TOPdGFP          | 8          | 3           | 312        | -          | -          | -          | 219         |
|        | $\beta$ Eng | TOPdGFP          | 8          | 3           | 438        | -          | -          | -          | 459         |
| 3E     | WT          | TBSmCherry       | 4          | 3           | 418        | -          | -          | -          | 590         |
|        | $\beta$ Eng | TBSmCherry       | 4          | 3           | 501        | -          | -          | -          | 754         |
| 4B     | WT          | Ki67             | 4          | 4           | 1522       | -          | -          | -          | 1420        |
|        | T151        | Ki67             | 4          | 4           | 1965       | -          | -          | -          | 1740        |
| 4C     | WT          | EdU              | 16         | 3           | 4057       | -          | -          | -          | 4180        |
|        | T151        | EdU              | 16         | 3           | 4892       | -          | -          | -          | 5214        |
| 4D     | WT          | TBSmCherry       | 4          | 3           | 254        | -          | -          | -          | 328         |
|        | T151        | TBSmCherry       | 4          | 3           | 452        | -          | -          | -          | 360         |
| 4E     | WT          | TOPdGFP          | 8          | 3           | 176        | -          | -          | -          | 159         |
|        | T151        | TOPdGFP          | 8          | 3           | 598        | -          | -          | -          | 262         |
| S3B    | Fucci       | Cdt1             | 0          | 4           | 2173       | -          | -          | -          | -           |
|        | Fucci       | Cdt1             | 4          | 3           | 5873       | -          | -          | -          | 5862        |
|        | Fucci       | Cdt1             | 8          | 3           | 5621       | -          | -          | -          | 4905        |
|        | Fucci       | Cdt1             | 16         | 3           | 5615       | -          | -          | -          | 5317        |
|        | Fucci       | Cdt1             | 24         | 3           | 6024       | -          | -          | -          | 5782        |
| S3D    | Fucci       | Geminin          | 0          | 4           | 2173       | -          | -          | -          | -           |
|        | Fucci       | Geminin          | 4          | 3           | 5873       | -          | -          | -          | 5862        |
|        | Fucci       | Geminin          | 8          | 3           | 5621       | -          | -          | -          | 4905        |
|        | Fucci       | Geminin          | 16         | 3           | 5615       | -          | -          | -          | 5317        |
|        | Fucci       | Geminin          | 24         | 3           | 6024       | -          | -          | -          | 5782        |
| S4B    | WT          | Yap1             | 1          | 4           | 1535       | 1637       | 795        | 1614       | 1529        |
|        | WT          | Yap1             | 2          | 4           | 1088       | 1587       | 1329       | 1450       | 1430        |
|        | WT          | Yap1             | 4          | 3           | 1215       | 1045       | 1185       | 1047       | 1019        |
|        | WT          | Yap1             | 6          | 3           | 1346       | 1264       | 1092       | 1238       | 1103        |
|        | WT          | Yap1             | 8          | 2           | 565        | 456        | 516        | 544        | 635         |
|        | WT          | Yap1             | 12         | 3           | 1251       | 1228       | 1103       | 1192       | 1299        |
|        | WT          | Yap1             | 16         | 2           | 476        | 346        | 349        | 362        | 461         |
|        | WT          | Yap1             | 24         | 2           | 679        | 455        | 646        | 652        | 522         |
| S5B    | WT          | $\beta$ -catenin | 1          | 2           | 621        | 666        | 742        | 571        | 746         |
|        | WT          | $\beta$ -catenin | 2          | 2           | 559        | 525        | 535        | 536        | 514         |

**Table S1. Continued**

| Figure | Treatment        | Biomarker        | Time (hrs) | Experiments | Cells (0%) | Cells (2%) | Cells (5%) | Cells (9%) | Cells (15%) |
|--------|------------------|------------------|------------|-------------|------------|------------|------------|------------|-------------|
|        | WT               | $\beta$ -catenin | 4          | 2           | 598        | 652        | 783        | 669        | 376         |
|        | WT               | $\beta$ -catenin | 6          | 3           | 440        | 437        | 1152       | 1019       | 885         |
|        | WT               | $\beta$ -catenin | 8          | 4           | 779        | 825        | 911        | 842        | 849         |
|        | WT               | $\beta$ -catenin | 12         | 4           | 1196       | 1223       | 1286       | 1297       | 1086        |
|        | WT               | $\beta$ -catenin | 16         | 2           | 298        | 289        | 448        | 471        | 493         |
|        | WT               | $\beta$ -catenin | 24         | 4           | 1620       | 1727       | 1846       | 1861       | 1676        |
| S6B    | WT               | Ki67             | N/A        | 4           | 2564       | -          | -          | -          | -           |
|        | YTIP             | Ki67             | N/A        | 4           | 405        | -          | -          | -          | -           |
| S6C    | WT               | TBSmCherry       | N/A        | 3           | 1127       | -          | -          | -          | -           |
|        | YTIP             | TBSmCherry       | N/A        | 3           | 168        | -          | -          | -          | -           |
| S6D    | WT               | TOPdGFP          | N/A        | 3           | 808        | -          | -          | -          | -           |
|        | YTIP             | TOPdGFP          | N/A        | 3           | 102        | -          | -          | -          | -           |
| S7C    | WT               | TOPdGFP          | N/A        | 2           | 28         | -          | -          | -          | -           |
|        | $\beta$ Eng      | TOPdGFP          | N/A        | 2           | 34         | -          | -          | -          | -           |
| S7D    | WT - LD          | EdU              | 24         | 3           | 676        | -          | -          | -          | -           |
|        | WT - HD          | EdU              | 24         | 3           | 1729       | -          | -          | -          | -           |
|        | $\beta$ Eng - LD | EdU              | 24         | 3           | 970        | -          | -          | -          | -           |
|        | $\beta$ Eng - HD | EdU              | 24         | 3           | 1711       | -          | -          | -          | -           |
| S8B    | DMSO             | Ki67             | 4          | 3           | 3393       | -          | -          | -          | 3586        |
|        | Vertiporfin      | Ki67             | 4          | 3           | 3338       | -          | -          | -          | 3629        |
|        | iCRT3            | Ki67             | 4          | 3           | 3496       | -          | -          | -          | 3641        |
| S8C    | DMSO             | EdU              | 24         | 3           | 2841       | -          | -          | -          | 3290        |
|        | Vertiporfin      | EdU              | 24         | 3           | 2830       | -          | -          | -          | 2873        |
|        | iCRT3            | EdU              | 24         | 3           | 3019       | -          | -          | -          | 3186        |
| S8D    | DMSO             | TBSmCherry       | 4          | 3           | 3393       | -          | -          | -          | 3586        |
|        | Vertiporfin      | TBSmCherry       | 4          | 3           | 3338       | -          | -          | -          | 3629        |
|        | iCRT3            | TBSmCherry       | 4          | 3           | 3496       | -          | -          | -          | 3641        |
| S8E    | DMSO             | TOPdGFP          | 8          | 3           | 2562       | -          | -          | -          | 2838        |
|        | Vertiporfin      | TOPdGFP          | 8          | 3           | 2697       | -          | -          | -          | 2716        |
|        | iCRT3            | TOPdGFP          | 8          | 3           | 2740       | -          | -          | -          | 2292        |
| S9B    | WT - LD          | EdU              | 24         | 3           | 676        | -          | -          | -          | -           |
|        | WT - HD          | EdU              | 24         | 3           | 1702       | -          | -          | -          | -           |
|        | T-D - LD         | EdU              | 24         | 3           | 929        | -          | -          | -          | -           |
|        | T-D - HD         | EdU              | 24         | 3           | 2249       | -          | -          | -          | -           |
|        | T+D - LD         | EdU              | 24         | 3           | 646        | -          | -          | -          | -           |
|        | T+D - HD         | EdU              | 24         | 3           | 1961       | -          | -          | -          | -           |
